# Supplementary material for: Human-to-Cattle Mycobacterium tuberculosis Complex Transmission in the United States
Source: Front Vet Sci. 2021 Jul 12;8:691192. doi: 10.3389/fvets.2021.691192 (PMC8311018; doi:10.3389/fvets.2021.691192)
Supplement: Supplementary file 1 [file Table_1.XLSX]

## Sheet: Case 1 ND Dairy-Human
	NC_002945.4:1040003	NC_002945.4:1832420	NC_002945.4:1947752	NC_002945.4:2114325	NC_002945.4:2264280	NC_002945.4:272021	NC_002945.4:2804936	NC_002945.4:476033	NC_002945.4:1151301	NC_002945.4:157445	NC_002945.4:167914	NC_002945.4:1737333	NC_002945.4:3844275	NC_002945.4:1101681	NC_002945.4:180180	NC_002945.4:2835744	NC_002945.4:3276354	NC_002945.4:3821213	NC_002945.4:3868848	NC_002945.4:875465	NC_002945.4:896130	NC_002945.4:1504978	NC_002945.4:170476	NC_002945.4:2468690	NC_002945.4:2607578	NC_002945.4:3560043	NC_002945.4:3743156	NC_002945.4:3784076	NC_002945.4:4123119	NC_002945.4:80342	NC_002945.4:1059126	NC_002945.4:1388068	NC_002945.4:1432004	NC_002945.4:256799	NC_002945.4:2895640	NC_002945.4:843206	NC_002945.4:1152741	NC_002945.4:202522	NC_002945.4:3091119	NC_002945.4:3506029	NC_002945.4:3779864	NC_002945.4:4026587	NC_002945.4:404962	NC_002945.4:4094402	NC_002945.4:4284177	NC_002945.4:758853	NC_002945.4:1785987	NC_002945.4:2735146	NC_002945.4:2297187
root	C	G	G	G	G	T	C	A	C	A	A	G	A	G	G	G	G	G	G	A	C	T	G	G	G	G	G	C	C	G	C	G	A	C	C	C	C	C	C	G	G	T	G	T	G	G	G	T	C
SRR1792074_2007_Fed_MX_US	T	T	A	A	T	G	T	G	T	G	G	C	G	T	T	A	A	A	A	C	G	T	G	G	G	G	G	C	C	G	C	G	A	C	C	C	C	C	C	G	G	T	G	T	G	G	G	T	C
SRR7236230_2009_Dairy_MX_MX	T	T	A	A	T	G	T	G	T	G	G	C	G	G	G	G	G	G	G	A	C	C	A	A	T	A	A	T	T	A	C	G	A	C	C	C	C	C	C	G	G	T	G	T	G	G	G	T	C
SRR7240044_1992_Fed_UNK_US	T	T	A	A	T	G	T	G	C	A	A	G	A	G	G	G	G	G	G	A	C	T	G	G	G	G	G	C	C	G	T	T	G	T	A	T	C	C	C	G	G	T	G	T	G	G	G	T	C
SRR1791796_2002_Fed_MX_US	T	T	A	A	T	G	T	G	C	A	A	G	A	G	G	G	G	G	G	A	C	T	G	G	G	G	G	C	C	G	T	T	G	T	A	C	A	T	G	A	C	C	C	C	T	A	G	T	C
SRR1791877_2003_Fed_MX_US	T	T	A	A	T	G	T	G	C	A	A	G	A	G	G	G	G	G	G	A	C	T	G	G	G	G	G	C	C	G	C	G	A	C	C	C	C	C	C	G	G	T	G	T	G	G	T	C	T
SRR7240283_1996_Fed_UNK_US	T	T	A	A	T	G	T	G	C	A	A	G	A	G	G	G	G	G	G	A	C	T	G	G	G	G	G	C	C	G	C	G	A	C	C	C	C	C	C	G	G	T	G	T	G	G	T	C	T
SRR1792450_2013_ Dairy_ND_US	T	T	A	A	T	G	T	G	C	A	A	G	A	G	G	G	G	G	G	A	C	T	G	G	G	G	G	C	C	G	C	G	A	C	C	C	C	C	C	G	G	T	G	T	G	G	T	C	C
SRR12554471_ 2013_Human_ND_US	T	T	A	A	T	G	T	G	C	A	A	G	A	G	G	G	G	G	G	A	C	T	G	G	G	G	G	C	C	G	C	G	A	C	C	C	C	C	C	G	G	T	G	T	G	G	T	C	C
SRR1792446_2013_Dairy_ND_US	T	T	A	A	T	G	T	G	C	A	A	G	A	G	G	G	G	G	G	A	C	T	G	G	G	G	G	C	C	G	C	G	A	C	C	C	C	C	C	G	G	T	G	T	G	G	T	C	C
SRR1791887_2003_Cattle_MX_MX	T	T	A	A	T	G	T	G	C	A	A	G	A	G	G	G	G	G	G	A	C	T	G	G	G	G	G	C	C	G	C	G	A	C	C	C	C	C	C	G	G	T	G	T	G	G	T	C	C
SRR1791886_2003_Cattle_MX_MX	T	T	A	A	T	G	T	G	C	A	A	G	A	G	G	G	G	G	G	A	C	T	G	G	G	G	G	C	C	G	C	G	A	C	C	C	C	C	C	G	G	T	G	T	G	G	T	C	C
SRR1792313_2012_Fed_MX_US	T	T	A	A	T	G	T	G	C	A	A	G	A	G	G	G	G	G	G	A	C	T	G	G	G	G	G	C	C	G	C	G	A	C	C	C	C	C	C	G	G	T	G	T	G	G	T	C	C
SRR1792333_2012_Fed_MX_US	T	T	A	A	T	G	T	G	C	A	A	G	A	G	G	G	G	G	G	A	C	T	G	G	G	G	G	C	C	G	C	G	A	C	C	C	C	C	C	G	G	T	G	T	G	G	T	C	C
MQ	60	60	60	60	60	60	60	60	60	60	60	60	60	60	60	60	60	60	60	60	60	60	60	60	60	60	60	60	60	60	60	60	60	60	60	59	60	60	60	60	60	60	60	60	60	60	60	60	60
annotations	TRANSMEMBRANE SERINE/THREONINE-PROTEIN KINASE D PKNDa [FIRST PART] (PROTEIN KINASE D) (STPK D), pknDa, BQ2027_MB0955C	iron-regulated universal stress protein family protein tb15.3, TB15.3, BQ2027_MB1662	possible succinate-semialdehyde dehydrogenase [nadp+] dependent (ssdh) gabd2, gabD2, BQ2027_MB1760	Probable reductase, None, BQ2027_MB1900C	6-phosphofructokinase pfkb (phosphohexokinase) (phosphofructokinase), pfkB, BQ2027_MB2054C	PROBABLE INTEGRAL MEMBRANE ACYLTRANSFERASE, None, BQ2027_MB0233	unknown protein, None, BQ2027_MB2546C	HYPOTHETICAL PROTEIN, None, BQ2027_MB0401	PROBABLE SENSOR PROTEIN KDPD, kdpD, BQ2027_MB1056C	SECRETED ANTIGEN 85-C FBPC (85C) (ANTIGEN 85 COMPLEX C) (AG58C) (MYCOLYL TRANSFERASE 85C) (FIBRONECTIN-BINDING PROTEIN C), fbpC, BQ2027_MB0134C	3-methyladenine DNA glycosylase/8-oxoguanine DNA glycosylase, None, BQ2027_MB0147	probable dna polymerase iii (alpha chain) dnae1 (dna nucleotidyltransferase), dnaE1, BQ2027_MB1574	PROBABLE DICARBOXYLIC ACID TRANSPORT INTEGRAL MEMBRANE PROTEIN KGTP (DICARBOXYLATE TRANSPORTER), kgtP, BQ2027_MB3503C	POSSIBLE LARGE-CONDUCTANCE ION MECHANOSENSITIVE CHANNEL MSCL, mscL, BQ2027_MB1011C	pe family protein pe2, PE2, BQ2027_MB0157C	HYPOTHETICAL ALANINE RICH PROTEIN, None, BQ2027_MB2570	PROBABLE INTEGRAL MEMBRANE PROTEIN, None, BQ2027_MB2987	esx conserved component eccd4. esx-4 type vii secretion system protein. probable integral membrane protein., eccd4, BQ2027_MB3478	MCE-FAMILY PROTEIN MCE4A, mce4A, BQ2027_MB3529C	POSSIBLE CONSERVED TRANSMEMBRANE PROTEIN, None, BQ2027_MB0802C	possible succinyltransferase in the gcn5-related n-acetyltransferase family, None, BQ2027_MB0825C	PROBABLE HYDROLASE, None, BQ2027_MB1368	PROBABLE TRANSCRIPTIONAL REGULATORY PROTEIN (POSSIBLY TETR-FAMILY), None, BQ2027_MB0149	Probable lipoate biosynthesis protein B LipB, lipB, BQ2027_MB2240	POSSIBLE CONSERVED TRANSMEMBRANE PROTEIN, None, BQ2027_MB2374	gcn5-related n-acetyltransferase, phosphorylase, None, BQ2027_MB3254C	possible triacylglycerol synthase (diacylglycerol acyltransferase), None, BQ2027_MB3406	cholesterol oxidase chod (cholesterol-o2 oxidoreductase), choD, BQ2027_MB3443C	ATP-dependent DNA ligase (EC, None, BQ2027_MB3757C	No annotated product	probable atp-dependent dna helicase ii uvrd1, uvrD1, BQ2027_MB0974	No annotated product	DNA double-strand break repair Rad50 ATPase, None, BQ2027_MB1309	PROBABLE FATTY-ACID-COA LIGASE FADD4 (FATTY-ACID-COA SYNTHETASE) (FATTY-ACID-COA SYNTHASE), fadD4, BQ2027_MB0220	PROBABLE HOLLIDAY JUNCTION DNA HELICASE RUVB, ruvB, BQ2027_MB2623C	possible antitoxin vapb31, vapb31, BQ2027_MB0769	Probable Potassium-transporting ATPase A chain KDPA (Potassium-translocating ATPase A chain) (ATP phosphohydrolase [potassium-transporting] A chain) (Potassium binding and translocating subunit A), kdpA, BQ2027_MB1058	MCE-FAMILY PROTEIN MCE1C, mce1C, BQ2027_MB0177	CRISPR-associated protein, Csm1 family, cas10, BQ2027_MB2847C	PROBABLE EPOXIDE HYDROLASE MESTB [SECOND PART] (EPOXIDE HYDRATASE) (ARENE-OXIDE HYDRATASE), mesTb, BQ2027_MB3201C	HYPOTHETICAL PROTEIN, None, BQ2027_MB3437C	dna topoisomerase i topa (omega-protein) (relaxing enzyme) (untwisting enzyme) (swivelase) (type i dna topoisomerase) (nicking-closing enzyme) (topo i), topA, BQ2027_MB3670C	probable iron-sulfur-binding reductase, None, BQ2027_MB0345C	ASPARTOKINASE ASK (ASPARTATE KINASE) [CONTAINS: ASPARTOKINASE ALPHA SUBUNIT (ASK-ALPHA); AND ASPARTOKINASE BETA SUBUNIT (ASK-BETA)], ask, BQ2027_MB3736C	esx conserved component ecca1. esx-1 type vii secretion system protein., ecca1, BQ2027_MB3898	POSSIBLE ARYLSULFATASE ATSD (ARYL-SULFATE SULPHOHYDROLASE) (ARYLSULPHATASE), atsD, BQ2027_MB0682	Probable L-aspartate oxidase nadB, nadB, BQ2027_MB1621	PROBABLE ATP-DEPENDENT CLP PROTEASE PROTEOLYTIC SUBUNIT 2 CLPP2 (ENDOPEPTIDASE CLP 2), clpP2, BQ2027_MB2487C	Polyprenol-monophosphomannose synthase Ppm1, ppm1, BQ2027_MB2077C
[truncated: 58 more columns]

## Sheet: Case 1 ND Dairy-Human SRA
Accession number	Year of isolation	Host	Production type	Origin	Detection
SRR1792074	2007	Cattle	Fed	MX	US
SRR7236230	2009	Cattle	Dairy	MX	MX
SRR7240044	1992	Cattle	Fed	UNK	US
SRR1791796	2002	Cattle	Fed	MX	US
SRR1791877	2003	Cattle	Fed	MX	US
SRR7240283	1996	Cattle	Fed	UNK	US
SRR1792450	2013	Cattle	Dairy	ND, US	US
SRR12554471	2013	Human	Not applicable	ND, US	US
SRR1792446	2013	Cattle	Dairy	ND, US	US
SRR1791887	2003	Cattle	Unknown	MX	MX
SRR1791886	2003	Cattle	Unknown	MX	MX
SRR1792313	2012	Cattle	Fed	MX	US
SRR1792333	2012	Cattle	Fed	MX	US

## Sheet: Case 2 WI Dairy-Human
	NC_002945.4:3307564	NC_002945.4:33788	NC_002945.4:69127	NC_002945.4:1770317	NC_002945.4:1770318	NC_002945.4:1932133	NC_002945.4:2135991	NC_002945.4:2442393	NC_002945.4:2575770	NC_002945.4:2788856	NC_002945.4:3160724	NC_002945.4:3531952	NC_002945.4:3749276	NC_002945.4:4349405	NC_002945.4:659596	NC_002945.4:956768	NC_002945.4:1543916	NC_002945.4:163610	NC_002945.4:2205417	NC_002945.4:2235245	NC_002945.4:2623627	NC_002945.4:2783473	NC_002945.4:3444998	NC_002945.4:3554945	NC_002945.4:3946156	NC_002945.4:4139968	NC_002945.4:4301056	NC_002945.4:4346498	NC_002945.4:489854	NC_002945.4:561897	NC_002945.4:659537	NC_002945.4:699828	NC_002945.4:759036	NC_002945.4:999285	NC_002945.4:1150712	NC_002945.4:1875922	NC_002945.4:145978	NC_002945.4:2527858	NC_002945.4:4130593	NC_002945.4:3680020	NC_002945.4:1410346	NC_002945.4:292279	NC_002945.4:1308887	NC_002945.4:4179513	NC_002945.4:581168	NC_002945.4:2118355	NC_002945.4:4277638	NC_002945.4:52603	NC_002945.4:102227
root	C	A	A	C	G	C	G	G	G	G	G	T	C	G	C	G	C	G	C	C	G	C	C	A	C	G	C	A	C	G	A	C	G	T	A	C	G	G	G	G	C	G	G	G	C	A	T	C	C
SRR1791945_2005_Fed_MX_US	A	G	C	A	A	T	A	A	A	A	A	C	T	A	T	A	C	G	C	C	G	C	C	A	C	G	C	A	C	G	A	C	G	T	A	C	G	G	G	G	C	G	G	G	C	A	T	C	C
SRR12554470_2015_Human_WI_US	A	G	C	C	G	C	G	G	G	G	G	T	C	G	C	G	T	C	T	A	C	A	T	G	T	T	T	G	G	A	G	T	A	C	A	C	G	G	G	G	C	G	G	G	C	A	T	C	C
SRR12554459_2018_Dairy_WI_US	A	G	C	C	G	C	G	G	G	G	G	T	C	G	C	G	T	C	T	A	C	A	T	G	T	T	T	G	G	A	G	T	A	C	G	C	G	G	G	G	C	G	G	G	C	A	T	C	C
SRR12554458_2018_Dairy_WI_US	A	G	C	C	G	C	G	G	G	G	G	T	C	G	C	G	T	C	T	A	C	A	T	G	T	T	T	G	G	A	G	T	A	C	G	C	G	G	G	G	C	G	G	G	C	A	T	C	C
SRR12554460_2018_Dairy_WI_US	A	G	C	C	G	C	G	G	G	G	G	T	C	G	C	G	T	C	T	A	C	A	T	G	T	T	T	G	G	A	G	T	A	C	G	C	G	G	G	G	C	G	G	G	C	A	T	C	C
SRR12554455_2018_Dairy_WI_US	A	G	C	C	G	C	G	G	G	G	G	T	C	G	C	G	T	C	T	A	C	A	T	G	T	T	T	G	G	A	G	T	A	C	G	C	G	G	G	G	C	G	G	G	C	A	T	C	C
SRR12554457_2018_Dairy_WI_US	A	G	C	C	G	C	G	G	G	G	G	T	C	G	C	G	T	C	T	A	C	A	T	G	T	T	T	G	G	A	G	T	A	C	G	C	G	G	G	G	C	G	G	G	C	A	T	C	C
SRR12554456_2018_Dairy_WI_US	A	G	C	C	G	C	G	G	G	G	G	T	C	G	C	G	T	C	T	A	C	A	T	G	T	T	T	G	G	A	G	T	A	C	G	C	G	G	G	G	C	G	G	G	C	A	T	C	C
SRR12554466_2019_Dairy_WI_US	A	G	C	C	G	C	G	G	G	G	G	T	C	G	C	G	T	C	T	A	C	A	T	G	T	T	T	G	G	A	G	T	A	C	G	T	G	G	G	G	C	G	G	G	C	A	T	C	C
SRR12554461_2019_Dairy_WI_US	A	G	C	C	G	C	G	G	G	G	G	T	C	G	C	G	T	C	T	A	C	A	T	G	T	T	T	G	G	A	G	T	A	C	G	C	G	G	G	G	C	G	G	G	C	A	T	C	C
SRR12554467_2019_Dairy_WI_US	A	G	C	C	G	C	G	G	G	G	G	T	C	G	C	G	T	C	T	A	C	A	T	G	T	T	T	G	G	A	G	T	A	C	G	C	A	T	G	G	C	G	G	G	C	A	T	C	C
SRR12554462_2018_Dairy_WI_US	A	G	C	C	G	C	G	G	G	G	G	T	C	G	C	G	T	C	T	A	C	A	T	G	T	T	T	G	G	A	G	T	A	C	G	C	G	G	A	G	C	G	G	G	C	A	T	C	C
SRR12554463_2018_Dairy_WI_US	A	G	C	C	G	C	G	G	G	G	G	T	C	G	C	G	T	C	T	A	C	A	T	G	T	T	T	G	G	A	G	T	A	C	G	C	G	G	A	A	C	G	G	G	C	A	T	C	C
SRR12554469_2018_Dairy_WI_US	A	G	C	C	G	C	G	G	G	G	G	T	C	G	C	G	T	C	T	A	C	A	T	G	T	T	T	G	G	A	G	T	A	C	G	C	G	G	G	G	T	G	G	G	C	A	T	C	C
SRR12554468_2018_Dairy_WI_US	A	G	C	C	G	C	G	G	G	G	G	T	C	G	C	G	T	C	T	A	C	A	T	G	T	T	T	G	G	A	G	T	A	C	G	C	G	G	G	G	T	G	G	G	C	A	T	C	C
SRR12554454_2018_Dairy_WI_US	A	G	C	C	G	C	G	G	G	G	G	T	C	G	C	G	T	C	T	A	C	A	T	G	T	T	T	G	G	A	G	T	A	C	G	C	G	G	G	G	T	A	G	G	C	A	T	C	C
SRR12554465_2020_Dairy_WI_US	A	G	C	C	G	C	G	G	G	G	G	T	C	G	C	G	T	C	T	A	C	A	T	G	T	T	T	G	G	A	G	T	A	C	G	C	G	G	G	G	C	G	C	A	T	A	T	C	C
SRR12554464_2020_Dairy_WI_US	A	G	C	C	G	C	G	G	G	G	G	T	C	G	C	G	T	C	T	A	C	A	T	G	T	T	T	G	G	A	G	T	A	C	G	C	G	G	G	G	C	G	G	G	C	G	C	T	C
SRR1792127_2008_Event-Roping_MX_US	A	G	C	C	G	C	G	G	G	G	G	T	C	G	C	G	C	G	C	C	G	C	C	A	C	G	C	A	C	G	A	C	G	T	A	C	G	G	G	G	C	G	G	G	C	A	T	C	A
SRR1792136_2008_Event-Roping_MX_US	A	G	C	C	G	C	G	G	G	G	G	T	C	G	C	G	C	G	C	C	G	C	C	A	C	G	C	A	C	G	A	C	G	T	A	C	G	G	G	G	C	G	G	G	C	A	T	C	A
SRR1792137_2008_Event-Roping_MX_US	A	G	C	C	G	C	G	G	G	G	G	T	C	G	C	G	C	G	C	C	G	C	C	A	C	G	C	A	C	G	A	C	G	T	A	C	G	G	G	G	C	G	G	G	C	A	T	C	A
SRR1792129_2008_Event-Roping_MX_US	A	G	C	C	G	C	G	G	G	G	G	T	C	G	C	G	C	G	C	C	G	C	C	A	C	G	C	A	C	G	A	C	G	T	A	C	G	G	G	G	C	G	G	G	C	A	T	C	A
SRR1792134_2008_Event-Roping_MX_US	A	G	C	C	G	C	G	G	G	G	G	T	C	G	C	G	C	G	C	C	G	C	C	A	C	G	C	A	C	G	A	C	G	T	A	C	G	G	G	G	C	G	G	G	C	A	T	C	A
SRR1792139_2008_Event-Roping_MX_US	A	G	C	C	G	C	G	G	G	G	G	T	C	G	C	G	C	G	C	C	G	C	C	A	C	G	C	A	C	G	A	C	G	T	A	C	G	G	G	G	C	G	G	G	C	A	T	C	A
SRR1792154_2008_Event-Roping_MX_US	A	G	c	C	G	C	G	G	G	G	G	T	C	G	C	G	C	G	C	C	G	C	C	A	C	G	C	A	C	G	A	C	G	T	A	C	G	G	G	G	C	G	G	G	C	A	T	C	A
SRR1792153_2008_Event-Roping_MX_US	A	G	C	C	G	C	G	G	G	G	G	T	C	G	C	G	C	G	C	C	G	C	C	A	C	G	C	A	C	G	A	C	G	T	A	C	G	G	G	G	C	G	G	G	C	A	T	C	A
SRR1792125_2008_Event-Roping_MX_US	A	G	C	C	G	C	G	G	G	G	G	T	C	G	C	G	C	G	C	C	G	C	C	A	C	G	C	A	C	G	A	C	G	T	A	C	G	G	G	G	C	G	G	G	C	A	T	C	A
SRR1792133_2008_Event-Roping_MX_US	A	G	C	C	G	C	G	G	G	G	G	T	C	G	C	G	C	G	C	C	G	C	C	A	C	G	C	A	C	G	A	C	G	T	A	C	G	G	G	G	C	G	G	G	C	A	T	C	A
SRR1792128_2008_Event-Roping_MX_US	A	G	C	C	G	C	G	G	G	G	G	T	C	G	C	G	C	G	C	C	G	C	C	A	C	G	C	A	C	G	A	C	G	T	A	C	G	G	G	G	C	G	G	G	C	A	T	C	A
SRR1792135_2008_Event-Roping_MX_US	A	G	C	C	G	C	G	G	G	G	G	T	C	G	C	G	C	G	C	C	G	C	C	A	C	G	C	A	C	G	A	C	G	T	A	C	G	G	G	G	C	G	G	G	C	A	T	C	A
SRR1792126_2008_Event-Roping_MX_US	A	G	C	C	G	C	G	G	G	G	G	T	C	G	C	G	C	G	C	C	G	C	C	A	C	G	C	A	C	G	A	C	G	T	A	C	G	G	G	G	C	G	G	G	C	A	T	C	A
SRR1792132_2008_Event-Roping_MX_US	A	G	C	C	G	C	G	G	G	G	G	T	C	G	C	G	C	G	C	C	G	C	C	A	C	G	C	A	C	G	A	C	G	T	A	C	G	G	G	G	C	G	G	G	C	A	T	C	A
SRR1792130_2008_Event-Roping_MX_US	A	G	C	C	G	C	G	G	G	G	G	T	C	G	C	G	C	G	C	C	G	C	C	A	C	G	C	A	C	G	A	C	G	T	A	C	G	G	G	G	C	G	G	G	C	A	T	C	A
SRR1792131_2008_Event-Roping_MX_US	A	G	C	C	G	C	G	G	G	G	G	T	C	G	C	G	C	G	C	C	G	C	C	A	C	G	C	A	C	G	A	C	G	T	A	C	G	G	G	G	C	G	G	G	C	A	T	C	A
SRR1792138_2008_Event-Roping_MX_US	A	G	C	C	G	C	G	G	G	G	G	T	C	G	C	G	C	G	C	C	G	C	C	A	C	G	C	A	C	G	A	C	G	T	A	C	G	G	G	G	C	G	G	G	C	A	T	C	A
SRR1792141_2008_Event-Roping_MX_US	A	G	C	C	G	C	G	G	G	G	G	T	C	G	C	G	C	G	C	C	G	C	C	A	C	G	C	A	C	G	A	C	G	T	A	C	G	G	G	G	C	G	G	G	C	A	T	C	A
MQ	59	60	60	60	60	60	60	60	60	60	60	60	60	60	60	60	59	59	59	60	59	60	52	59	60	59	60	59	59	60	59	60	60	59	60	60	60	59	60	60	60	60	60	60	60	60	60	59	59
annotations	PROBABLE TRANSCRIPTIONAL REGULATORY PROTEIN, None, BQ2027_MB3013	No annotated product	PROBABLE CONSERVED TRANSMEMBRANE PROTEIN, None, BQ2027_MB0065	Probable phiRV1 phage protein, None, BQ2027_MB1601	Probable phiRV1 phage protein, None, BQ2027_MB1601	Probable oxidoreductase, None, BQ2027_MB1741	putative oxidoreductase, nitronate monooxygenase family, None, BQ2027_MB1927C	Probable Rieske iron-sulfur protein QcrA, qcrA, BQ2027_MB2218	PROBABLE CATIONIC AMINO ACID TRANSPORT INTEGRAL MEMBRANE PROTEIN ROCE, rocE, BQ2027_MB2347C	PROBABLE ACETYL-/PROPIONYL-COA CARBOXYLASE (BETA SUBUNIT) ACCD1, accD1, BQ2027_MB2530C	30s ribosomal protein s2 rpsb, rpsB, BQ2027_MB2914C	POSSIBLE TRANSMEMBRANE CATION TRANSPORTER, None, BQ2027_MB3225C	halimadienyl diphosphate synthase, None, BQ2027_MB3411C	No annotated product	PROBABLE METHYLTRANSFERASE/METHYLASE, None, BQ2027_MB0582	POSSIBLE ACYL-COA THIOLASE FADA, fadA, BQ2027_MB0882	probable conserved lipoprotein lprf, lprF, BQ2027_MB1403	PROBABLE CYTOCHROME P450 138 CYP138, cyp138, BQ2027_MB0141	POSSIBLE CONSERVED PERMEASE, None, BQ2027_MB2001C	No annotated product	Possible regulatory protein Trx, None, BQ2027_MB2391C	No annotated product	probable cytochrome p450 141 cyp141, cyp141, BQ2027_MB3144	transcriptional regulatory protein whib-like whib1. contains [4fe-4s]2+ cluster., whiB1, BQ2027_MB3245	ppe family protein ppe64, PPE64, BQ2027_MB3588	POSSIBLE CYTIDINE/DEOXYCYTIDYLATE DEAMINASE, None, BQ2027_MB3778C	esx-1 secretion-associated protein espl, espl, BQ2027_MB3910C	PROBABLE GLUCOSE-INHIBITED DIVISION PROTEIN B GID, gid, BQ2027_MB3950C	PROBABLE MEMBRANE BOUND POLYKETIDE SYNTHASE PKS6B [SECOND PART], pks6b, BQ2027_MB0413	MYCOLIC ACID SYNTHASE PCAA (CYCLOPROPANE SYNTHASE), pcaA, BQ2027_MB0479C	No annotated product	two component sensor kinase [first part], None, BQ2027_MB0617C	POSSIBLE ARYLSULFATASE ATSD (ARYL-SULFATE SULPHOHYDROLASE) (ARYLSULPHATASE), atsD, BQ2027_MB0682	possible triacylglycerol synthase (diacylglycerol acyltransferase), None, BQ2027_MB0919	PROBABLE SENSOR PROTEIN KDPD, kdpD, BQ2027_MB1056C	Probable polyketide synthase pks8, pks8, BQ2027_MB1690	PROBABLE ELONGATION FACTOR G FUSA2B [SECOND PART] (EF-G), fusA2b, BQ2027_MB0124C	HYPOTHETICAL PROTEIN, None, BQ2027_MB2292C	PROBABLE CONSERVED TRANSMEMBRANE PROTEIN, None, BQ2027_MB3764	PROBABLE SUGAR-TRANSPORT INTEGRAL MEMBRANE PROTEIN SUGI, sugI, BQ2027_MB3364	ADENYLYL CYCLASE (ATP PYROPHOSPHATE-LYASE) (ADENYLATE CYCLASE), None, BQ2027_MB1295	PROBABLE ACYL-COA DEHYDROGENASE FADE5, fadE5, BQ2027_MB0250C	PROBABLE NADPH DEPENDENT 2,4-DIENOYL-COA REDUCTASE FADH (2,4-dienoyl coenzyme A reductase) (4-enoyl-CoA reductase), fadH, BQ2027_MB1208C	arabinofuranosyltransferase afta, afta, BQ2027_MB3821	PUTATIVE TWO COMPONENT SENSOR HISTIDINE KINASE SENX3, senX3, BQ2027_MB0500	link to sulfotransferase activity, None, BQ2027_MB1905	Antiactivator of flagellar biosynthesis FleN, an ATPase, None, BQ2027_MB3890	POSSIBLE MEMBRANE PROTEIN, None, BQ2027_MB0049C	cation transporter p-type atpase a ctpa, ctpA, BQ2027_MB0095
[truncated: 36 more columns]

## Sheet: Case 2 WI Dairy-Human SRA
Accession number	Year of isolation	Host	Production type	Origin	Detection
SRR1791945	2005	Cattle	Fed	MX	US
SRR12554470	2015	Human	Not applicable	WI, US	US
SRR12554459	2018	Cattle	Dairy	WI, US	US
SRR12554458	2018	Cattle	Dairy	WI, US	US
SRR12554460	2018	Cattle	Dairy	WI, US	US
SRR12554455	2018	Cattle	Dairy	WI, US	US
SRR12554457	2018	Cattle	Dairy	WI, US	US
SRR12554456	2018	Cattle	Dairy	WI, US	US
SRR12554466	2019	Cattle	Dairy	WI, US	US
SRR12554461	2019	Cattle	Dairy	WI, US	US
SRR12554467	2019	Cattle	Dairy	WI, US	US
SRR12554462	2018	Cattle	Dairy	WI, US	US
SRR12554463	2018	Cattle	Dairy	WI, US	US
SRR12554469	2018	Cattle	Dairy	WI, US	US
SRR12554468	2018	Cattle	Dairy	WI, US	US
SRR12554454	2018	Cattle	Dairy	WI, US	US
SRR12554465	2020	Cattle	Dairy	WI, US	US
SRR12554464	2020	Cattle	Dairy	WI, US	US
SRR1792127	2008	Cattle	Event- Roping	MX	US
SRR1792136	2008	Cattle	Event- Roping	MX	US
SRR1792137	2008	Cattle	Event- Roping	MX	US
SRR1792129	2008	Cattle	Event- Roping	MX	US
SRR1792134	2008	Cattle	Event- Roping	MX	US
SRR1792139	2008	Cattle	Event- Roping	MX	US
SRR1792154	2008	Cattle	Event- Roping	MX	US
SRR1792153	2008	Cattle	Event- Roping	MX	US
SRR1792125	2008	Cattle	Event- Roping	MX	US
SRR1792133	2008	Cattle	Event- Roping	MX	US
SRR1792128	2008	Cattle	Event- Roping	MX	US
SRR1792135	2008	Cattle	Event- Roping	MX	US
SRR1792126	2008	Cattle	Event- Roping	MX	US
SRR1792132	2008	Cattle	Event- Roping	MX	US
SRR1792130	2008	Cattle	Event- Roping	MX	US
SRR1792131	2008	Cattle	Event- Roping	MX	US
SRR1792138	2008	Cattle	Event- Roping	MX	US
SRR1792141	2008	Cattle	Event- Roping	MX	US
